# Supplementary material for: Nitric oxide–sensitive guanylyl cyclase stimulation improves experimental heart failure with preserved ejection fraction
Source: JCI journal article supplement (doi:10.1172/jci.insight.96006), 2018-02-22
Supplement: sd1 [file 1]

## SUPPLEMENTAL DATA

### Online Tables

Table S1. Primer sequences used for RT-PCR.

| Gene          |       | Sequences (5'→3')           |
|---------------|-------|-----------------------------|
| <i>Mhy6</i>   | for   | CGGGAGAACCAGTCCATCCT        |
|               | rev   | ACACGCTTCGTGTTGACAGTCT      |
|               | probe | SYBR                        |
| <i>Mhy7</i>   | for   | GCCAAGACAGTTCGGAATGATAA     |
|               | rev   | CCTGTTGCCCAAATGG            |
|               | probe | SYBR                        |
| <i>Fn</i>     | for   | GGACCTGCACGCCAATAGCT        |
|               | rev   | TCCCCACGACGTAGGAA           |
|               | probe | AGAAATGTTTTGATCACGCTGCTGGGA |
| <i>Ctgf</i>   | for   | CGCCAACCGCAAGATTG           |
|               | rev   | CACGGACCCACCGAAGAC          |
|               | probe | CACTGCCAAAGATGGTGCACCCTG    |
| <i>Ngal</i>   | for   | CAGGGCAGGTGGTTCGTT          |
|               | rev   | AGCGGCTTTGTCTTTCTTTCTG      |
|               | probe | TCGGCCTGGCAGCGAATGC         |
| 18S           | for   | ACATCCAAGGAAGGCAGCAG        |
|               | rev   | TTTTCGTCACTACCTCCCCG        |
|               | probe | CGCGCAAATTACCCACTCCCGAC     |
| <i>Nfkbia</i> | for   | CCTGTACGCCCCAGCATCT         |
|               | rev   | TAGACACGTGTGGCCGTTGT        |
|               | probe | SYBR                        |
| <i>Kcnj3</i>  | for   | TGCGCAACAGCCACATG           |
|               | rev   | AGGTGTCTGCCGAGATTTGAG       |
|               | probe | SYBR                        |
| <i>Timp4</i>  | for   | TGCTGGAACGGAAGCTCTATG       |
|               | rev   | GCAGATGCCATCAACATGCT        |
|               | probe | SYBR                        |
| <i>Mmp15</i>  | for   | CACCCATTTGACGCAGAT          |
|               | rev   | CATGCACAGCCACCAGAAAG        |
|               | probe | SYBR                        |
| <i>Pparg</i>  | for   | TGACTTGGCCATATTTATAGCTGTCA  |
|               | rev   | CGATGGGCTTCACGTTTCA         |
|               | probe | SYBR                        |

|               |                     |                                                         |
|---------------|---------------------|---------------------------------------------------------|
| <i>Cx3cl1</i> | for<br>rev<br>probe | GCAAGCGCGCCATCA<br>TGGACCCATTTCTCCTTTGG<br>SYBR         |
| <i>Myc</i>    | for<br>rev<br>probe | CGAGCTGAAGCGTAGCTTTTTT<br>GGCCTTTTCGTTGTTTTCCA<br>SYBR  |
| <i>Mt1a</i>   | for<br>rev<br>probe | CGGCTGCAAGAAGTGCAAAT<br>ACTTGTCCGAGGCACCTTTG<br>SYBR    |
| <i>Hmox1</i>  | for<br>rev<br>probe | GGCCTGGCTTTTTTTCACCTT<br>CGAGCACGATAGAGCTGTTTGA<br>SYBR |
| <i>Kcnd2</i>  | for<br>rev<br>probe | GCAGAGCAAGCGGAATGG<br>GCTAACGAAGGCCGGTTCA<br>SYBR       |
| <i>Trpv4</i>  | for<br>rev<br>probe | CCTATCTGTGTGCCATGGTCAT<br>TCCACTGTGGTCCGGTAAGG<br>SYBR  |
| <i>Scn4b</i>  | for<br>rev<br>probe | GCCACCACCATCTACGCTATC<br>AGCCATAACAGCTGGAGAAGGT<br>SYBR |

## Online Figures

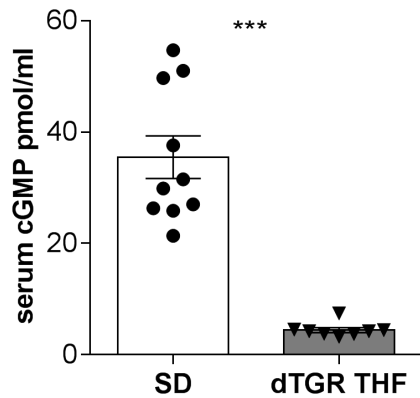

**Figure S1.** dTGRs with terminal heart failure (THF) exhibit significantly reduced serum cGMP levels compared to SD control rats (\*\* $p < 0.001$ ; Mann-Whitney U test; data expressed as mean  $\pm$  SEM; SD  $n = 10$ ; dTGR THF  $n = 8$ ).

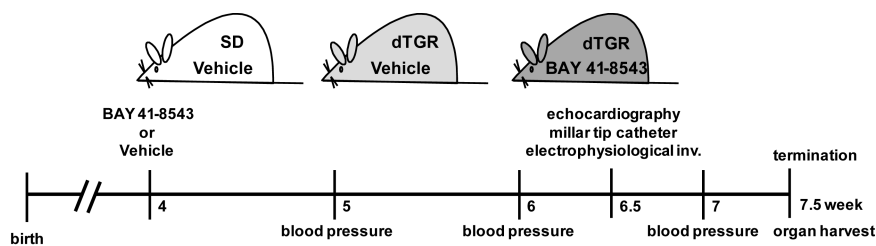

**Figure S2.** Experimental flow chart of *in vivo* study design.

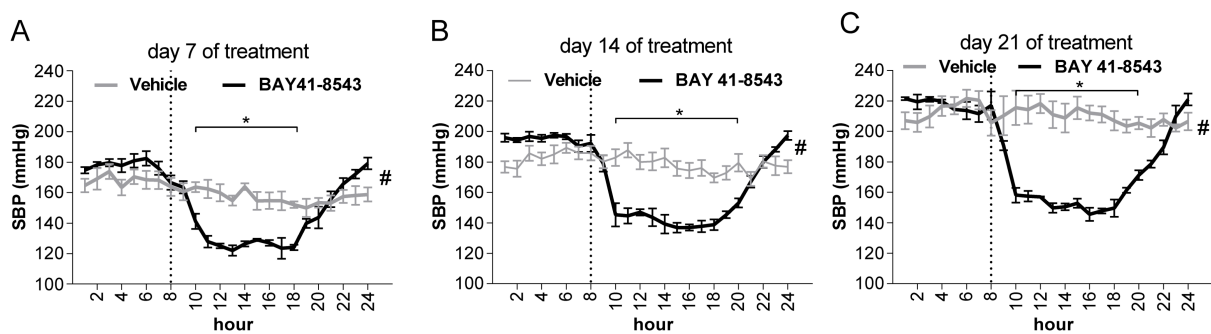

**Figure S3.** 24-hour time course of telemetrically recorded systolic blood pressure (SBP) on day 7 (A), 14 (B) and 21 (C) in vehicle ( $n = 5$ ) and BAY 41-8543-treated dTGR ( $n = 4$ ). Dotted line represents oral gavage of vehicle or BAY 41-8543. ( $\# p < 0.5$  Two-way ANOVA; data expressed as mean  $\pm$  SEM)

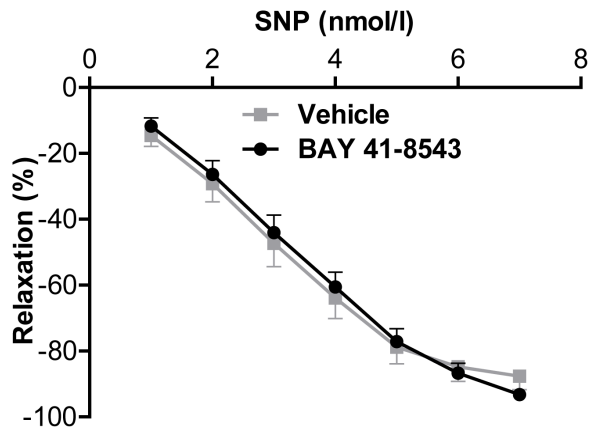

**Figure S4.** Endothelial independent relaxation of mesenteric arteries by sodium nitroprusside was similar in BAY 41-8543-treated compared to vehicle-treated dTGR. (data expressed as mean±SEM; Vehicle n=27; BAY 41-8543 n=29)

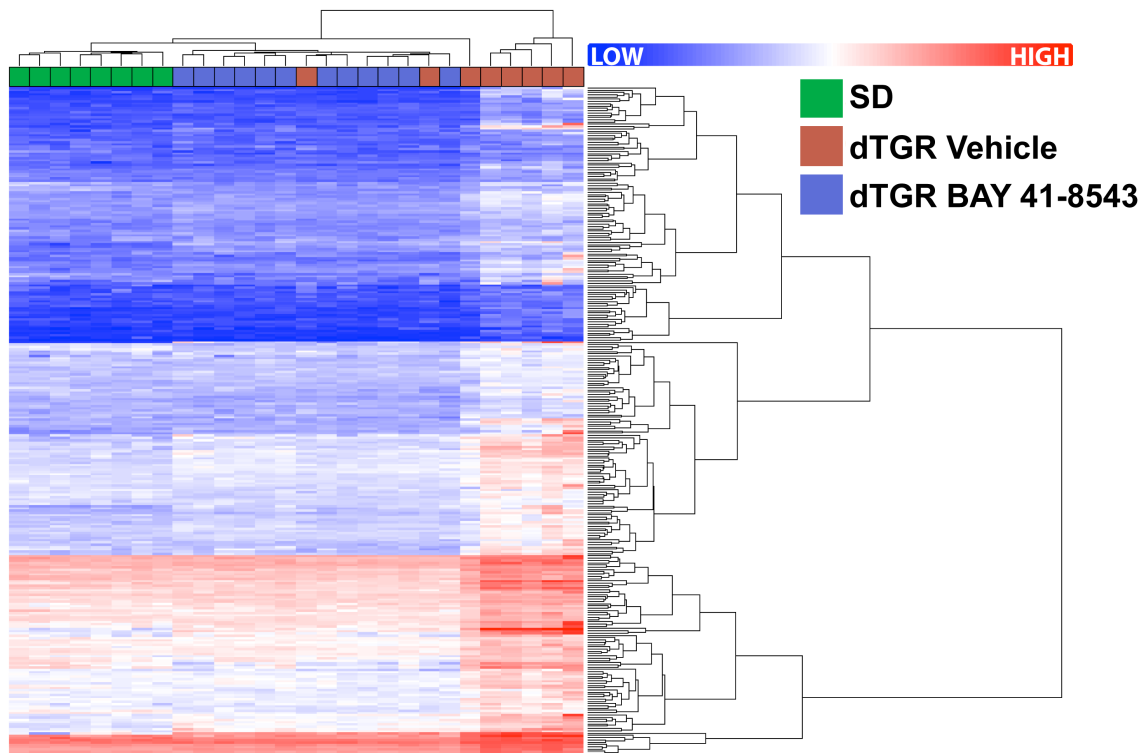

**Figure S5.** Two-way hierarchical clustering of the 844 genes whose expression significantly changed between BAY 41-8543 and vehicle-treated dTGR. The mRNA clustering tree is shown on the right and the sample clustering tree appears at the top (green circles for SD rats, red diamonds for vehicle treated dTGR and blue squares for BAY 41-8543 treated dTGR). The color scale indicates the relative expression level of mRNAs, with red representing a high expression level and blue a low expression level. (SD n=8; Vehicle n=8; BAY 41-8543 n=12)

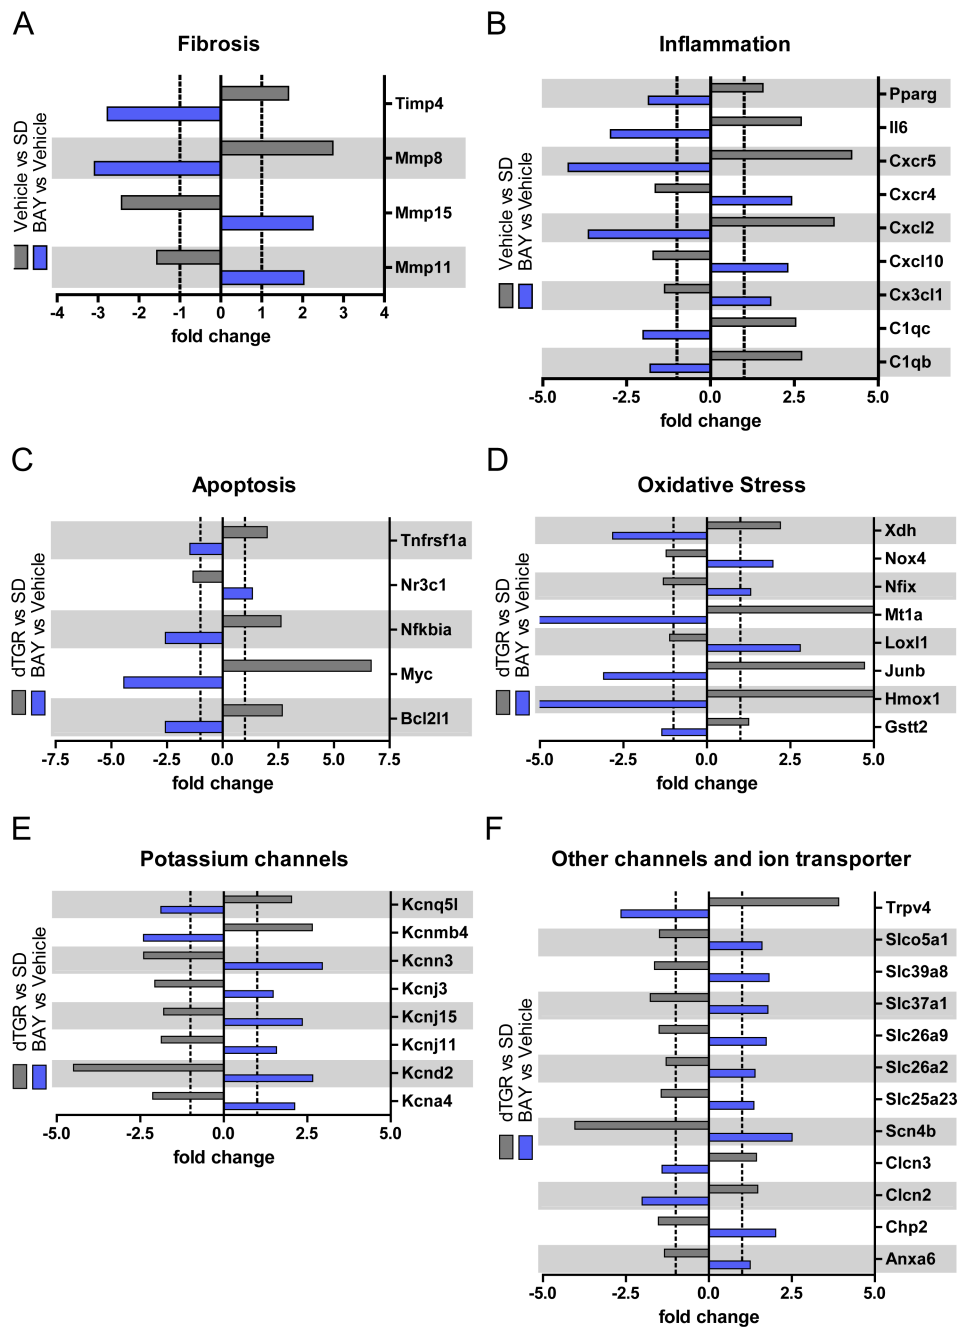

**Figure S6.** GO term functional analysis showed amelioration of dysregulated genes in the heart of dTGR by BAY 41-8543 treatment had an impact on fibrosis inflammation, apoptosis, oxidative stress, potassium channels and other channels and ion transporters.

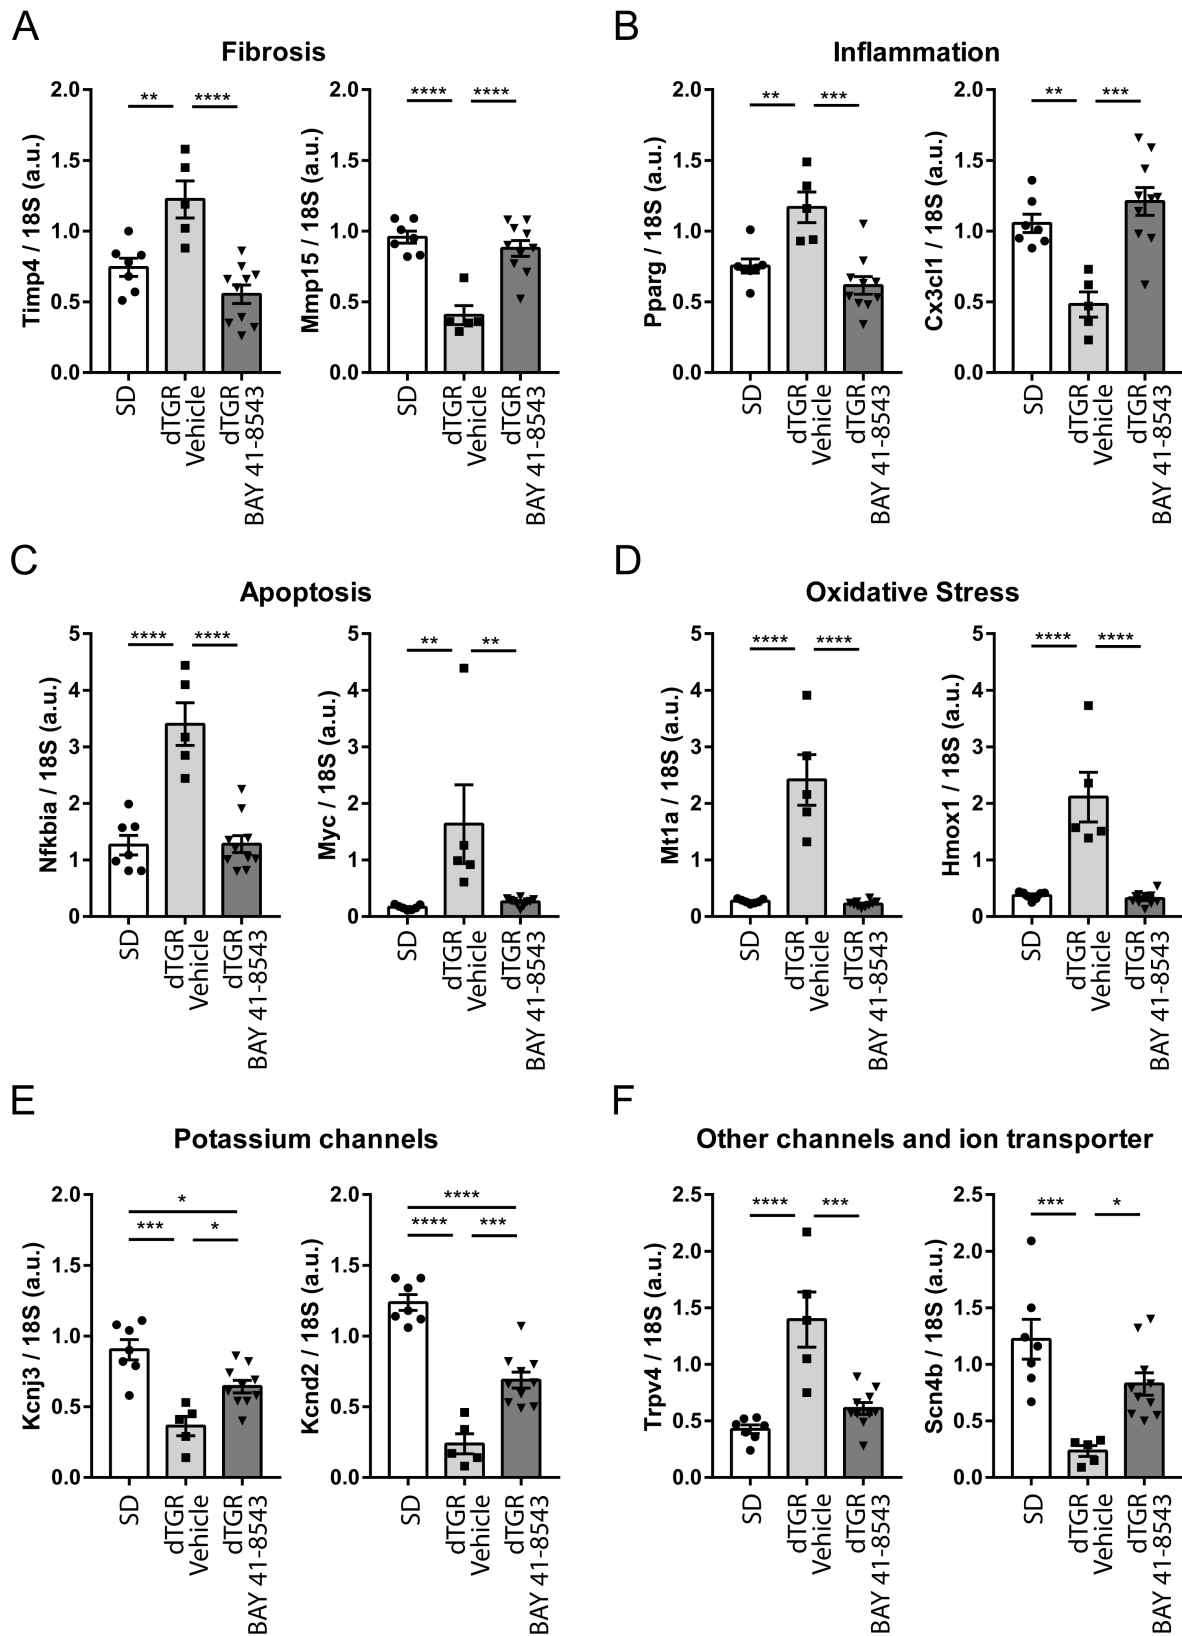

**Figure S7.** A) Cardiac mRNA expression of the fibrosis-related genes metalloproteinase inhibitor 4 (Timp4) and matrix metalloproteinase 15 (Mmp15). B) Cardiac mRNA expression of the inflammation-related genes peroxisome proliferator-

activated receptor gamma (Pparg) and fractalkine (Cx3cl1). **C**) Cardiac mRNA expression of the apoptosis-related genes nuclear factor 'kappa-light-chain-enhancer' of activated B-cells inhibitor alpha (Nfkbia) and Myc. **D**) Cardiac mRNA expression of the oxidative stress-related genes metallothionein-1A (Mt1a) and heme oxygenase 1 (Hmox1). **E**) Cardiac mRNA expression of the potassium inwardly-rectifying channel subfamily J member 3 (Kcnj3) and potassium voltage-gated channel subfamily D member 2 (Kcnd2). **F**) Cardiac mRNA expression of the transient receptor potential cation channel subfamily V member 4 (Trpv4) and sodium channel  $\beta$ -subunit 4 (Scn4b).

(\* $p < 0.05$ , \*\* $p < 0.01$ , \*\*\* $p < 0.001$ , \*\*\*\* $p < 0.0001$ ; one-way ANOVA with Tukey's post hoc test; data expressed as mean $\pm$ SEM; (SD n=7; Vehicle n=5; BAY 41-8543 n=10).

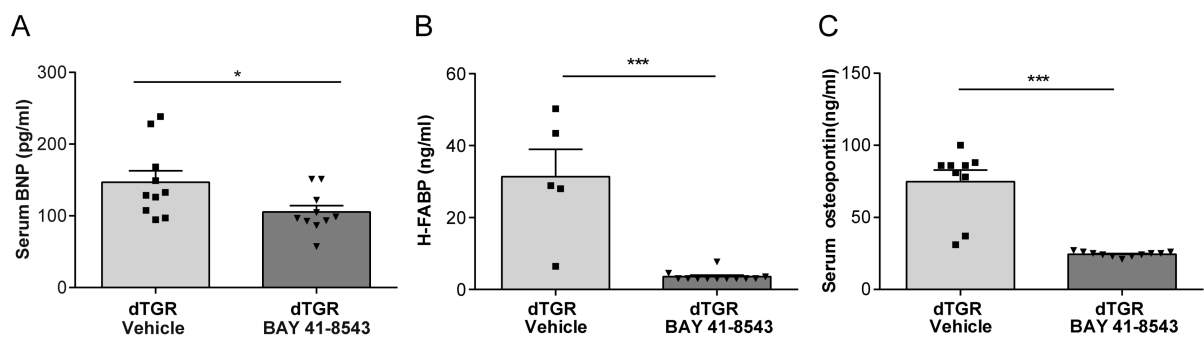

**Figure S8.** Serum BNP (A), H-FABP (B) and Osteopontin (C) levels were significantly decreased in BAY 41-8543-treated dTGR compared to vehicle-treated dTGR. (\* $p < 0.05$  \*\*\* $p < 0.001$ ; Student t-test test; data expressed as mean $\pm$ SEM; Vehicle n=5-10; BAY 41-8543 n=10-11)

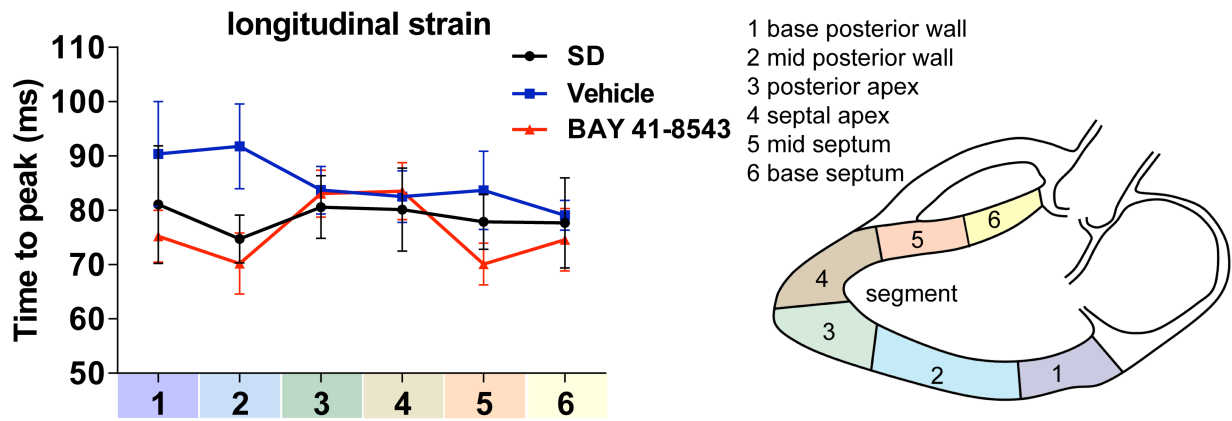

**Figure S9.** Time to peak longitudinal strain showed no changes in vehicle-treated dTGRs compared to nontransgenic SD rats and BAY 41-8543 treated dTGRs within the six myocardial segments. (Two-way ANOVA; data expressed as mean  $\pm$  SEM; SD n=4; Vehicle n=6; BAY 41-8543 n=10) Left ventricle was divided into six segments in parasternal long axis.

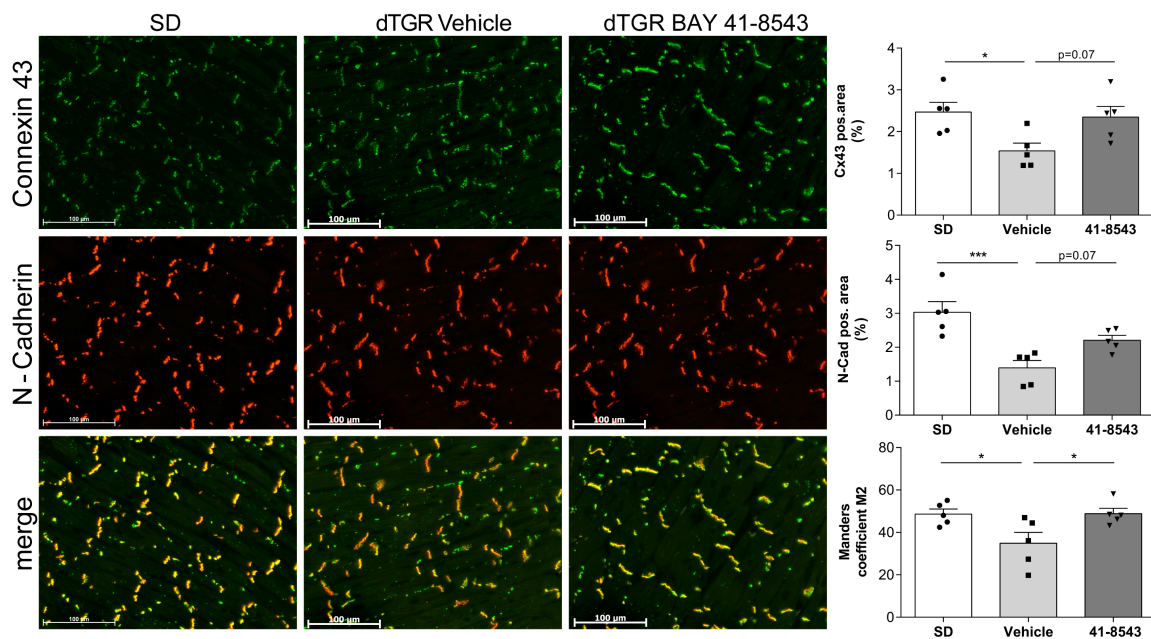

**Figure S10.** Representative immunofluorescence stainings of left ventricular sections prepared from SD rats, vehicle-treated and BAY 41-8543-treated dTGR. The sections were co-stained for connexin 43 (Cx43) (green fluorescent signal) and N-cadherin (N-Cad) (red). Cx43 and N-cad are colocalized (yellow) to the intercalated disks. This normal Cx43 localization was largely preserved in BAY 41-8543-treated dTGR,



whereas in vehicle-treated dTGR a redistribution of Cx43 could be observed. Quantitative analysis of Cx43, N-cadherin and colocalization of Cx43 and N-cadherin was performed and is shown on the right side. (\* $p < 0.05$ ; one-way ANOVA with Tukey's post hoc test; data expressed as mean $\pm$ SEM; SD n=5; Vehicle n=5; BAY 41-8543 n=5)
